# Supplementary material for: Cell cycle population effects in perturbation studies
Source: PubMed Central journal article supplement (PMC4265054; doi:10.15252/msb.20145172), 2014-07-01
Supplement: msb0010-0732-sd1.pdf [file msb0010-0732-sd1.pdf]

## Supplementary Figure 1

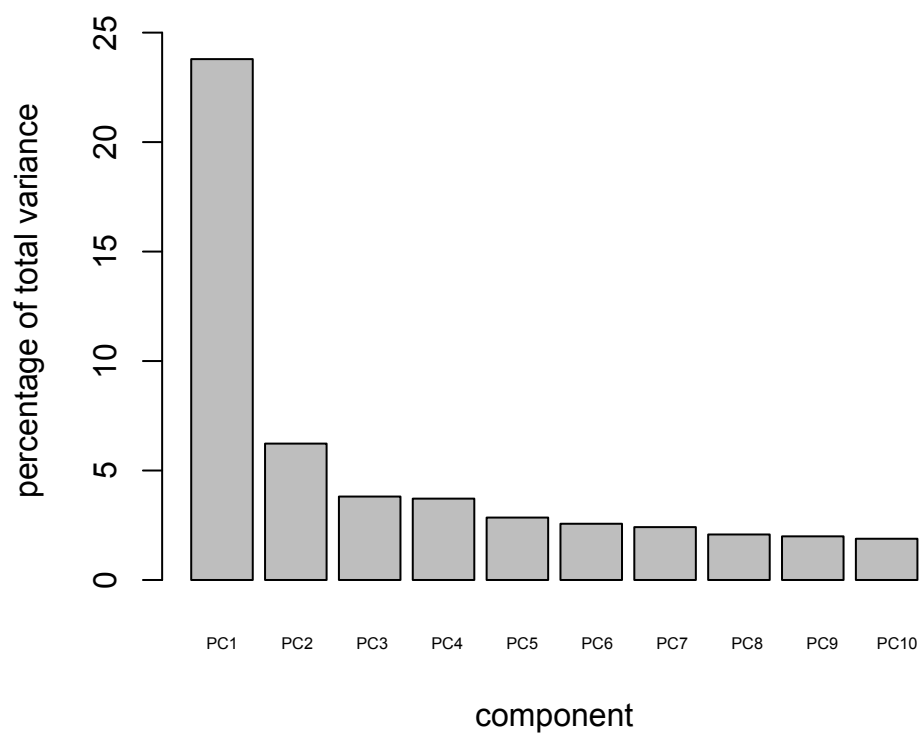

**Supplementary figure S1:** Principal component analysis.

The percentage of variance captured by the first 10 principal components. The slow growth profile corresponds to the first principal component and represents 24% of the total variance.
