# Supplementary material for: Cell cycle population effects in perturbation studies
Source: PubMed Central journal article supplement (PMC4265054; doi:10.15252/msb.20145172), 2014-07-01
Supplement: msb0010-0732-sd3.pdf [file msb0010-0732-sd3.pdf]

Supplementary figure 3

**A**

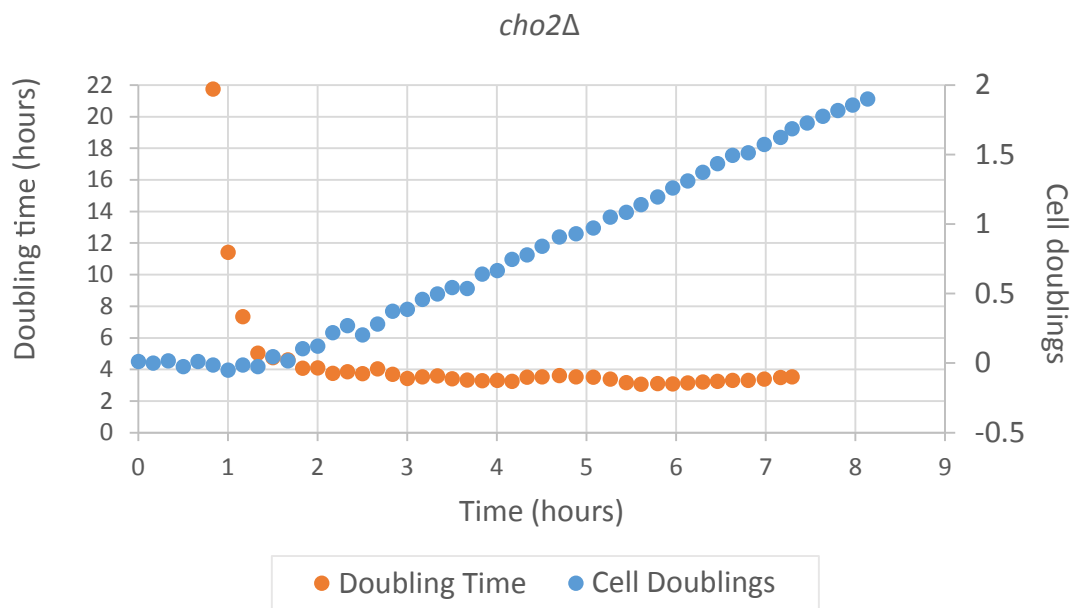

**B**

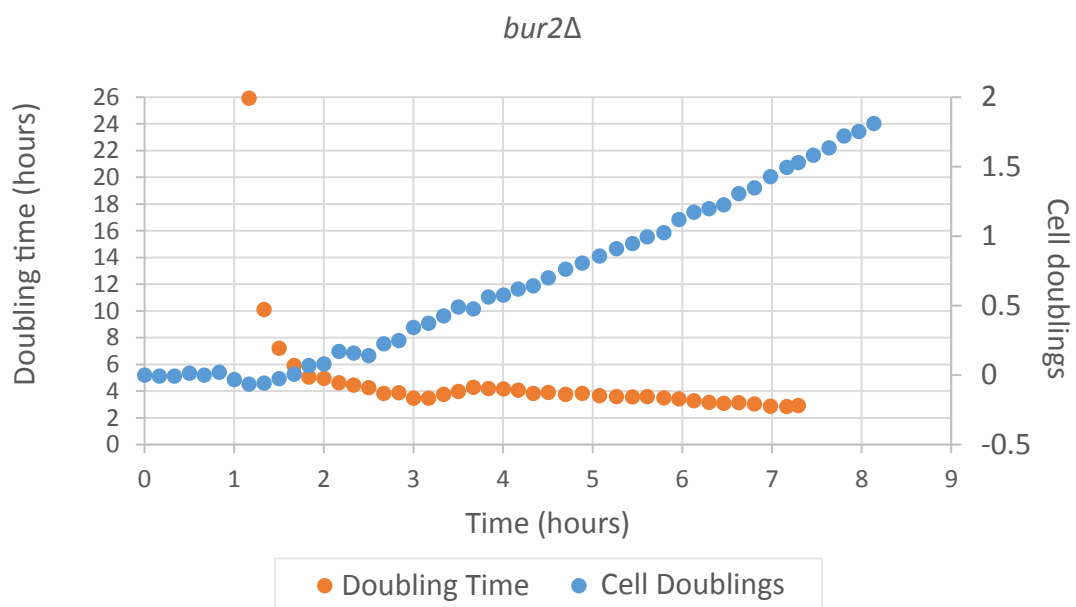

**C**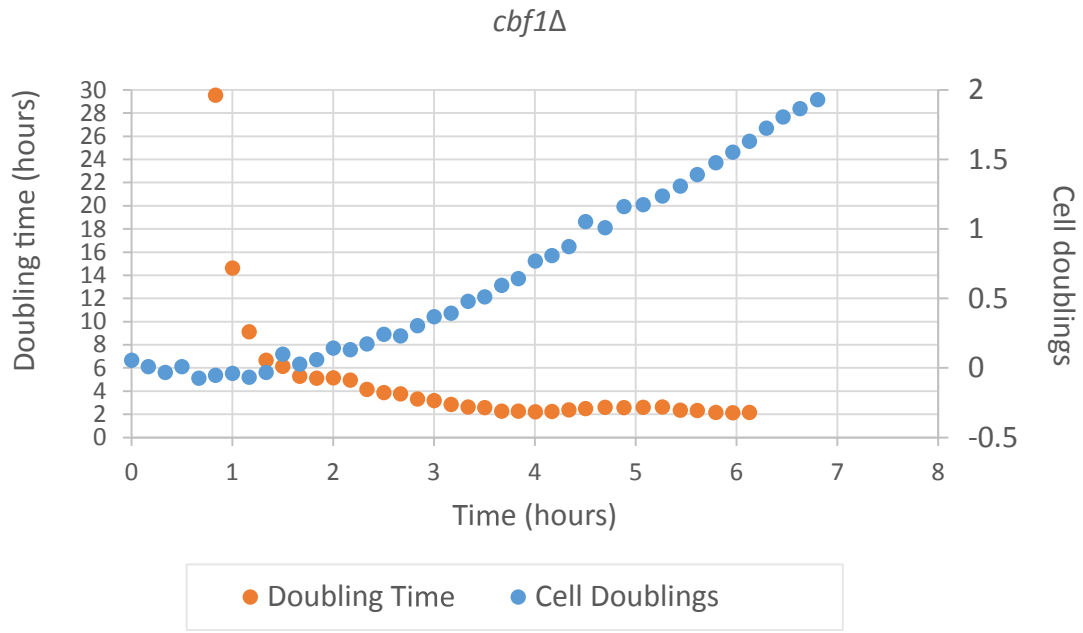**D**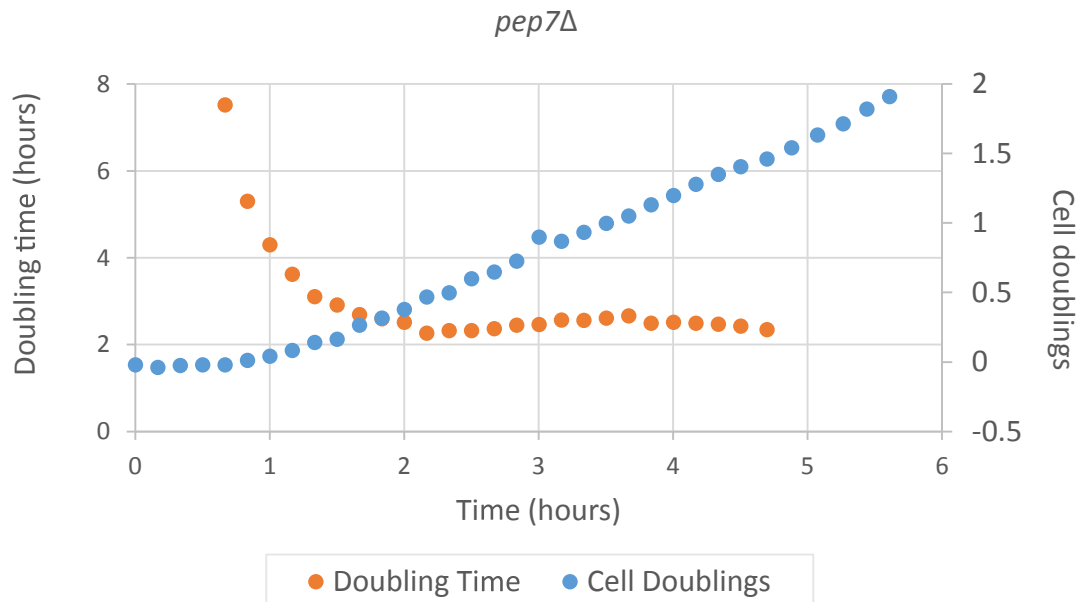

**Supplementary Figure S3. Deletion mutants have attained balanced growth. (A-D)** Plots showing the doubling time (orange dots, left y-axis) and cell doublings (blue dots, right y-axis) over time of the four slowest deletion strains in figure 5. Doubling times were calculated over a sliding window containing 10 optical density measurements.
