# Supplementary material for: Cell cycle population effects in perturbation studies
Source: PubMed Central journal article supplement (PMC4265054; doi:10.15252/msb.20145172), 2014-07-01
Supplement: msb0010-0732-sd5.pdf [file msb0010-0732-sd5.pdf]

Supplementary figure 5

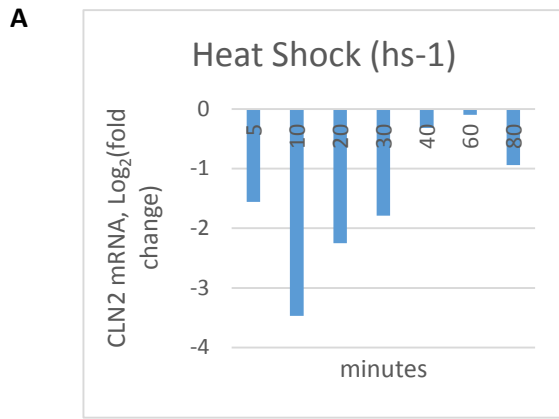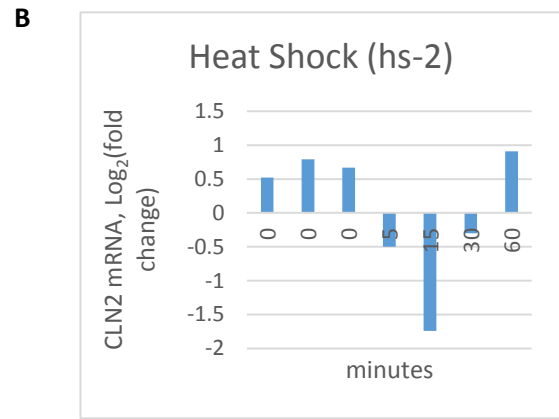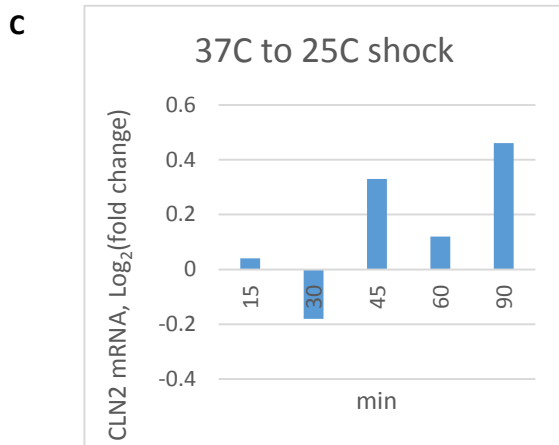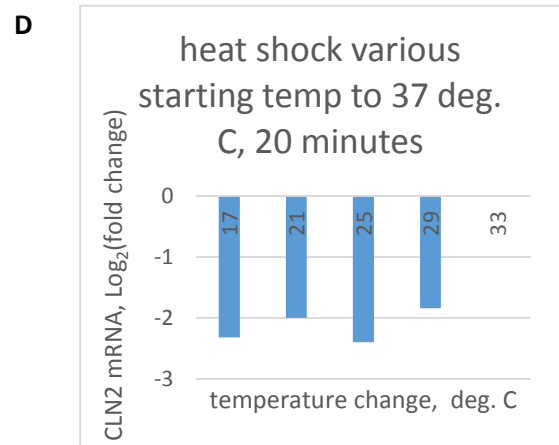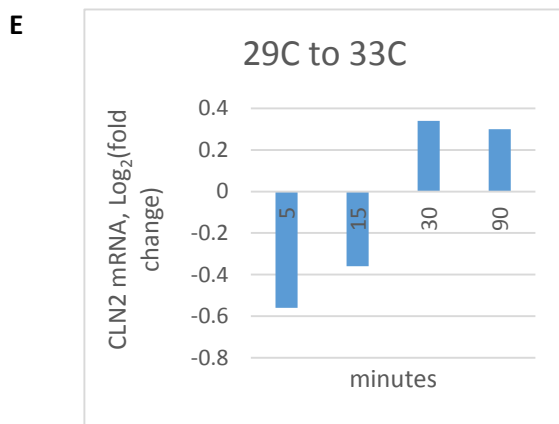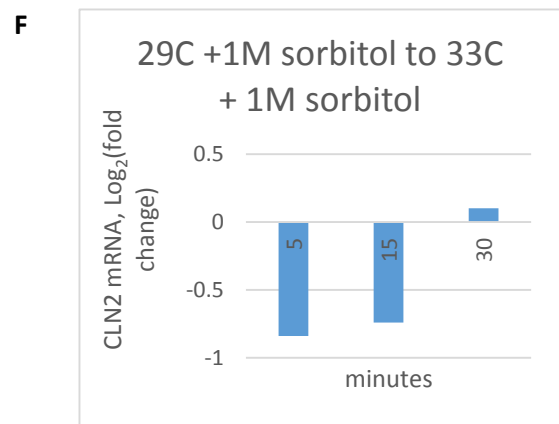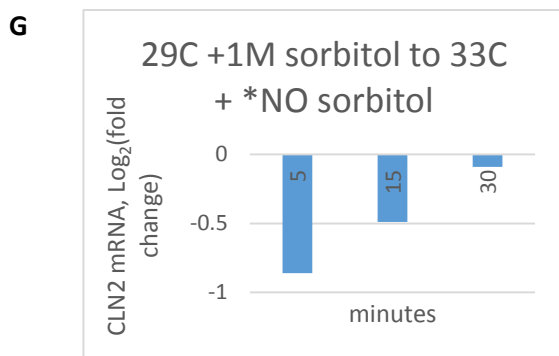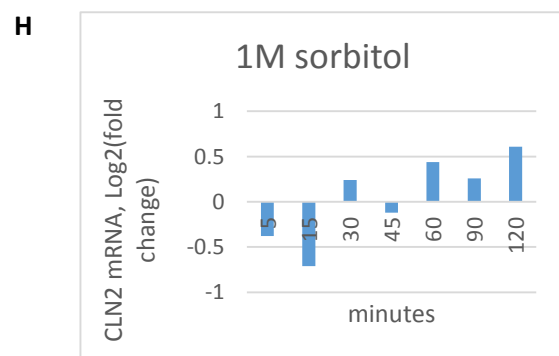

**I**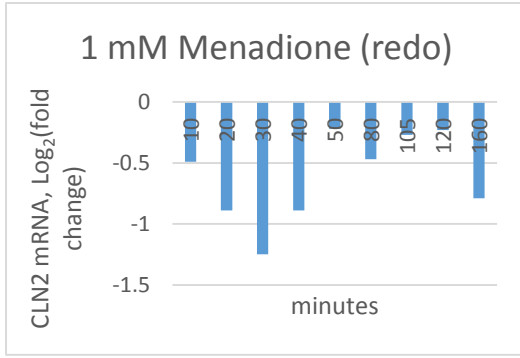**J**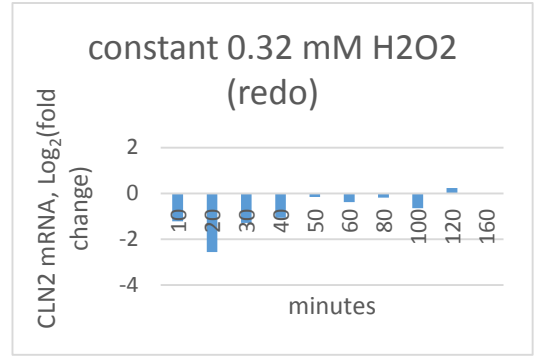**K**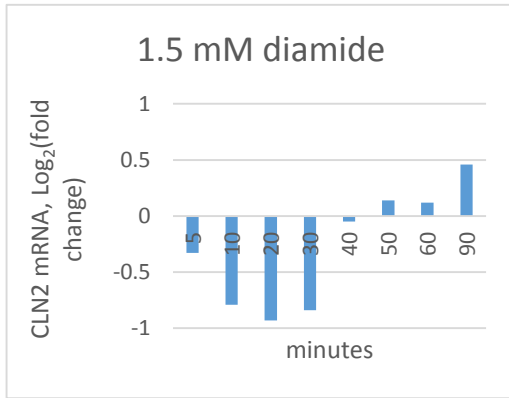**L**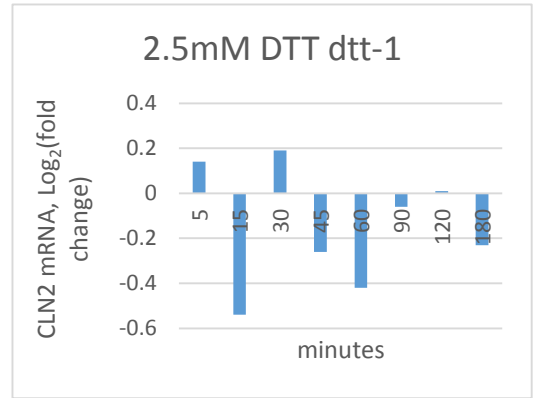**M**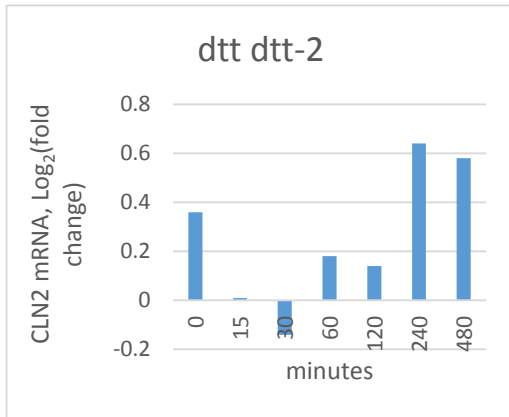**N**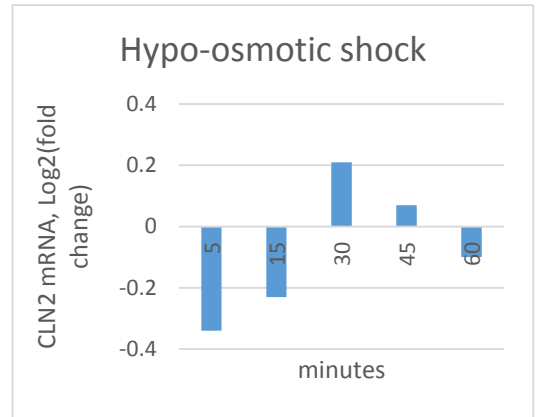**O**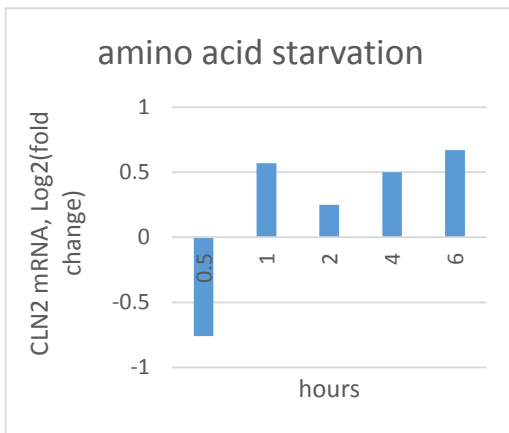**P**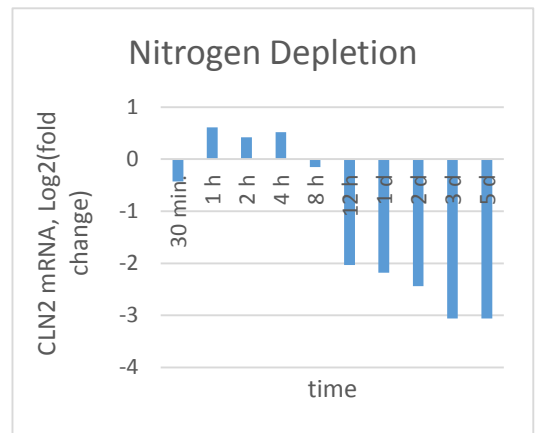

**Q**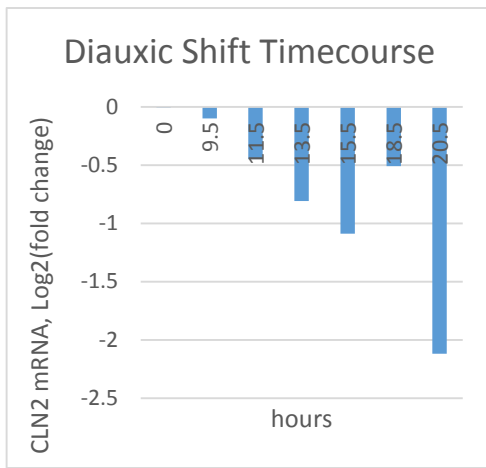**R**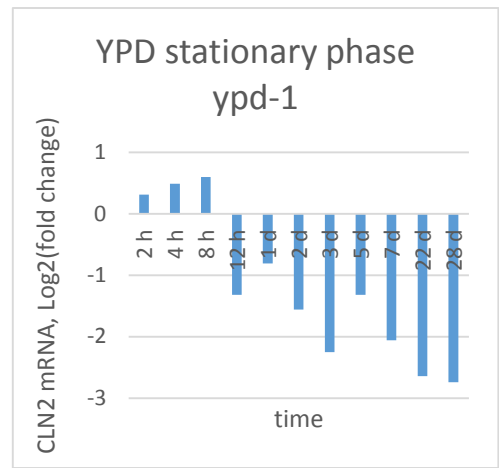**S**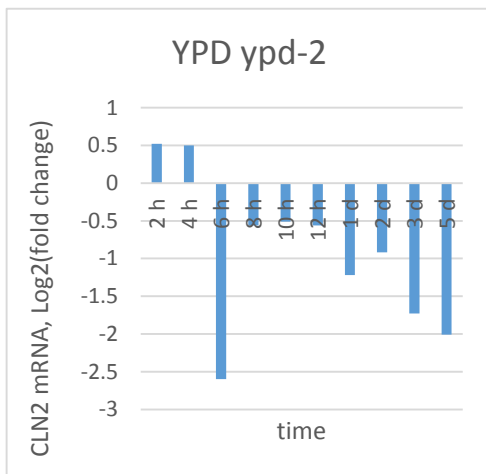

**Supplementary figure S5. CLN2 mRNA expression during stress time courses from Gasch et. al., study. (A-S) CLN2 mRNA expression.**
