# Supplementary material for: Cell cycle population effects in perturbation studies
Source: PubMed Central journal article supplement (PMC4265054; doi:10.15252/msb.20145172), 2014-07-01
Supplement: msb0010-0732-sd6.pdf [file msb0010-0732-sd6.pdf]

# Supplementary figure 6

A

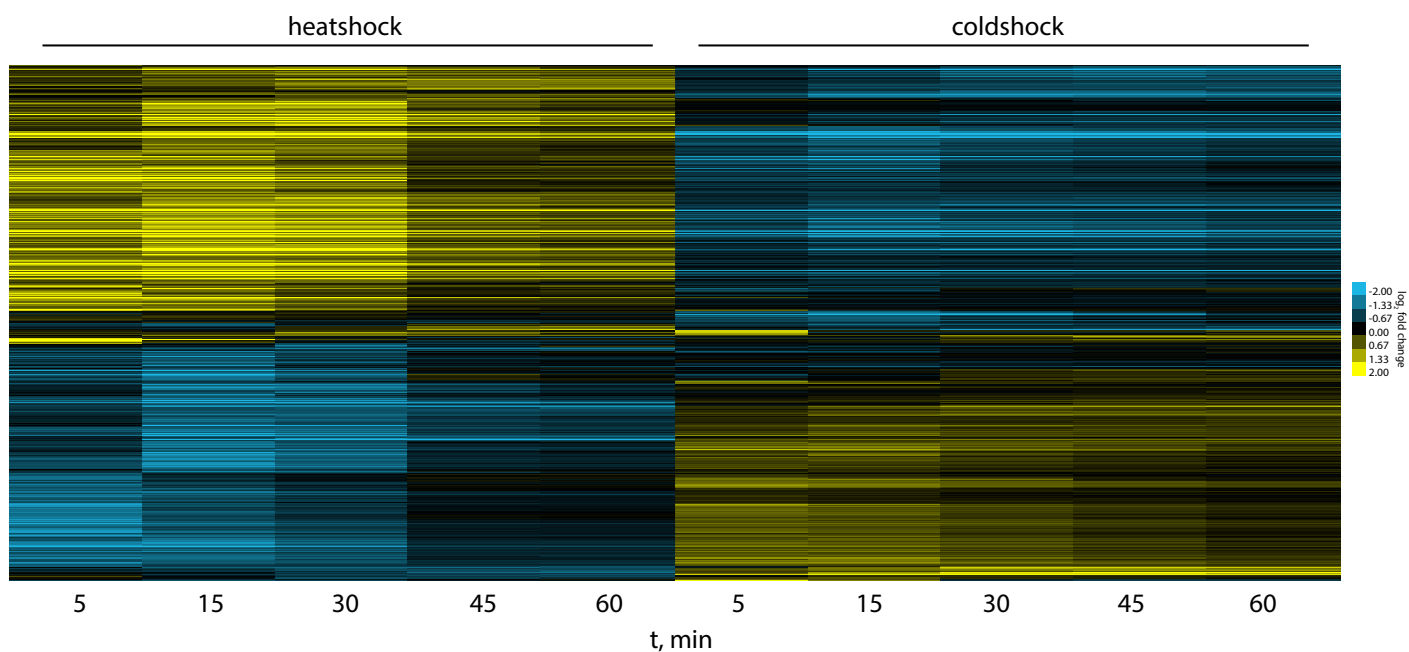

B

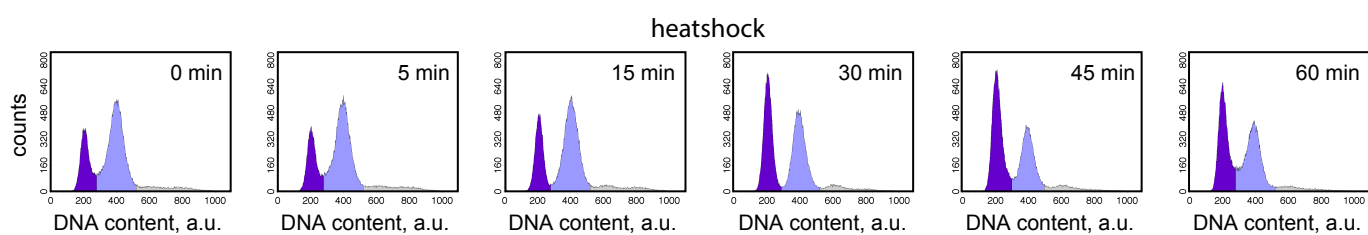

C

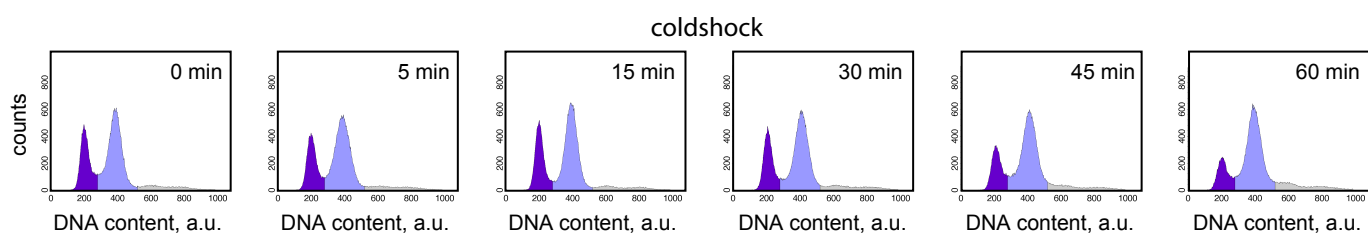

D

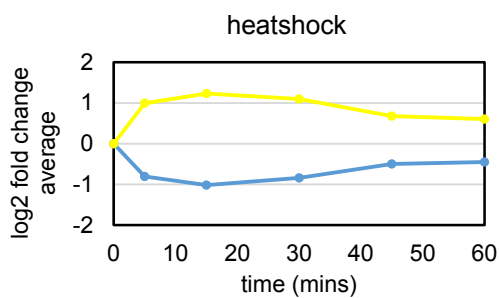

E

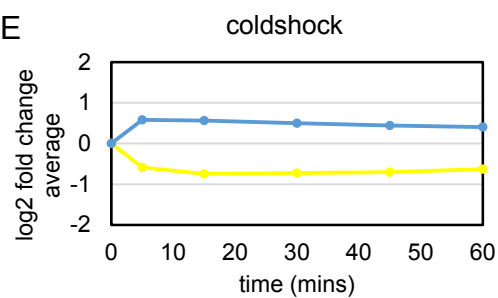

F

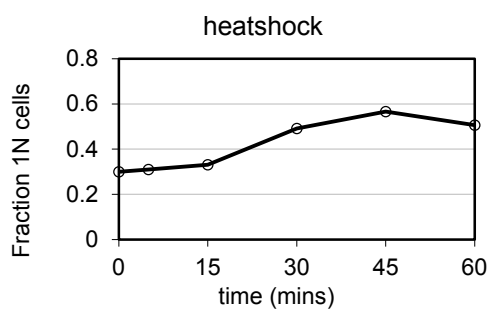

G

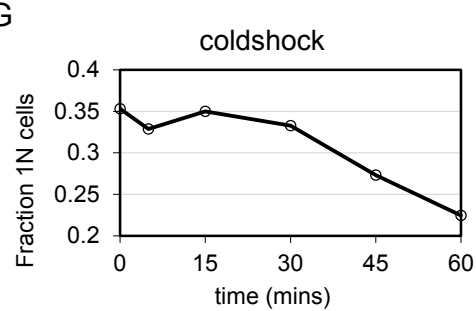

**Supplementary figure S6. Cold shifted cells display the opposite flow cytometry profile shift compared to heat shocked cells. (A)** Heat map of mRNA expression changes during a heat shock and cold shock time series including all transcripts changing more than 1.7-fold and  $p < 0.05$  in any single time point compared to  $t=0$ . **(B)** Time series of flow cytometry profiles after heat shock. **(C)** Time series of flow cytometry profiles after cold shock. **(D)** Average magnitude of gene expression changes as shown in (A) above for genes with increased (yellow) or decreased (blue) expression during heat shock. **(E)** Average magnitude of gene expression changes during cold shock, as shown in (A) above, colours as in (D). **(F)** Fraction of 1N cells during heat shock. **(G)** Fraction of 1N cells during cold shock.
